# Supplementary material
Source: Springer Nature journal article supplement (https://www.springermedizin.de/resource/supplementary/12874_2012_843_MOESM2_ESM.pdf/9432602)

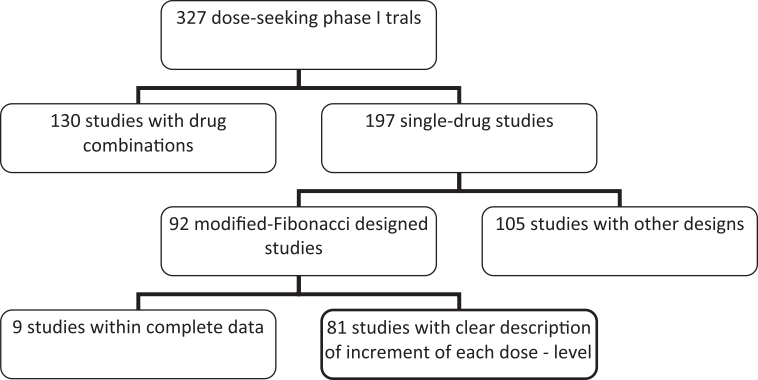

Supplement: MOESM2 [file 9432602]
